# Supplementary material for: Impact of Global Mean Normalization on Regional Glucose Metabolism in the Human Brain
Source: Hindawi journal article supplement (doi:10.1155/2018/6120925), 2018-06-12
Supplement: f1 [file 6120925.f1.pdf]

## SUPPLEMENTARY MATERIALS

for

### Impact of global mean normalization on regional glucose metabolism in the human brain

Kristian N. Mortensen,<sup>1,2</sup> Albert Gjedde,<sup>2</sup> Garth J. Thompson<sup>1</sup>, Peter Herman<sup>1</sup>, Maxime J. Parent<sup>1</sup>,  
Douglas L. Rothman<sup>1,3</sup>, Ron Kupers<sup>2</sup>, Maurice Ptito,<sup>2,4,5</sup> Johan Stender<sup>2,6</sup>, Steven Laureys<sup>6</sup>,  
Valentin Riedl<sup>7</sup>, Michael T. Alkire<sup>8</sup>, Fahmeed Hyder<sup>1,3</sup>

<sup>1</sup>Department of Radiology & Biomedical Imaging and Magnetic Resonance Research Center,  
Yale University, New Haven, CT, USA

<sup>2</sup>Department of Neuroscience and Pharmacology,  
University of Copenhagen, Copenhagen, Denmark

<sup>3</sup>Department of Biomedical Engineering, Yale University, New Haven, CT, USA

<sup>4</sup>Chaire de Recherche Harland Sanders, School of Optometry,  
University of Montreal, Montreal, Canada

<sup>5</sup>Neuropsychiatry laboratory, Psychiatric Centre, Rigshospitalet, Copenhagen, Denmark

<sup>6</sup>GIGA-Consciousness, Coma Science Group, Université de Liège, Liège, Belgium

<sup>7</sup>Departments of Neuroradiology, Nuclear Medicine and Neuroimaging Center,  
Technische Universität München, München, Germany

<sup>8</sup>Department of Anesthesiology, University of California, Irvine, CA, USA

**Figure S1.** Voxel-to-voxel correlations of  $qCMR_{glc}$  in gray matter of human brain.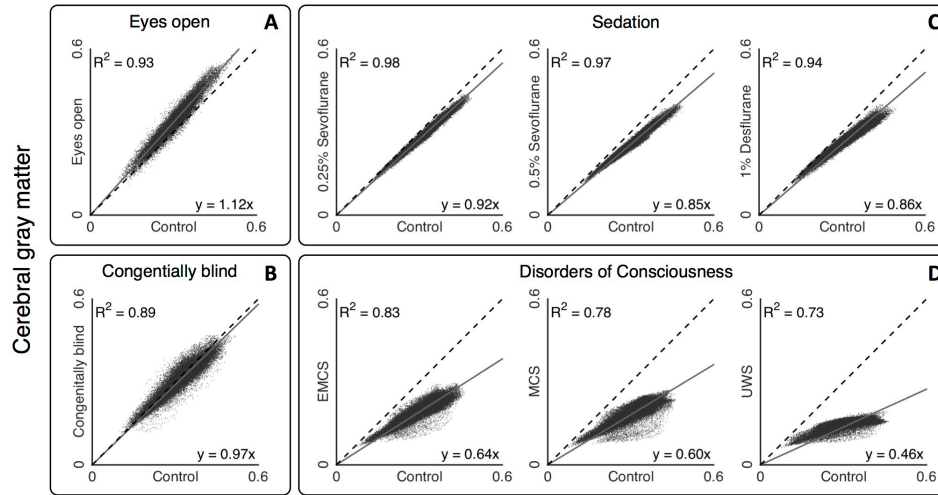

The horizontal axis represents the  $qCMR_{glc}$  for the control group (i.e., normal awake sighted people with eyes closed; **Figure 2A, middle**), whereas the vertical axis displays the  $qCMR_{glc}$  for the 8 other groups, which included **(A)** normal awake sighted people with eyes open (**Figure 2A, top**), **(B)** awake people with congenital blindness (**Figure 2A, bottom**), **(C)** normal people under sedation (i.e., 1% desflurane, 0.25% sevoflurane, 0.5% sevoflurane; **Figure 2B**), and **(D)** patients with disorders of consciousness (i.e., unresponsive wakefulness syndrome (UWS), minimally conscious state (MCS), emergence from MCS (EMCS); **Figure 2C**). All correlation coefficients, derived from all voxels in gray matter, were highly significant (i.e.,  $R^2$  ranging from 0.73 to 0.98), where lines for regression and identity are, respectively, shown with solid and dashed lines. **(A)** The normal eyes open group (vs. the control group) showed  $\sim 12\%$  higher  $qCMR_{glc}$ . **(B)** The congenitally blind group (vs. the control group) showed 2-3% lower  $qCMR_{glc}$ . **(C)** The sedated groups (vs. the control group) showed  $\sim 8\%$  lower  $qCMR_{glc}$  with 0.25% sevoflurane,  $\sim 15\%$  lower  $qCMR_{glc}$  with 0.5% sevoflurane, and  $\sim 14\%$  lower  $qCMR_{glc}$  with 1% desflurane. **(D)** The disorders of consciousness groups (vs. the control group) showed  $\sim 36\%$  lower  $qCMR_{glc}$  with EMCS,  $\sim 40\%$  lower  $qCMR_{glc}$  with MCS, and  $\sim 54\%$  lower  $qCMR_{glc}$  with UWS. See **Table 3** for comparison of slopes and intercepts when the linear regression was conducted without forcing the intercept through the origin.

**Figure S2.** Voxel-to-voxel correlations of  $qCMR_{glc}$  in white matter of human brain.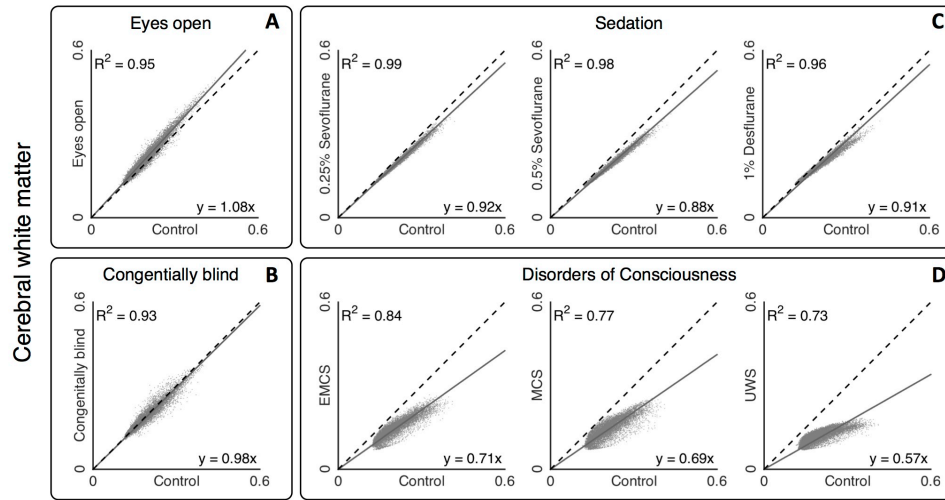

The horizontal axis represents the  $qCMR_{glc}$  for the control group (i.e., normal awake sighted people with eyes closed; **Figure 2A, middle**), whereas the vertical axis displays the  $qCMR_{glc}$  for the 8 other groups, which included **(A)** normal awake sighted people with eyes open (**Figure 2A, top**), **(B)** awake people with congenital blindness (**Figure 2A, bottom**), **(C)** normal people under sedation (i.e., 1% desflurane, 0.25% sevoflurane, 0.5% sevoflurane; **Figure 2B**), and **(D)** patients with disorders of consciousness (i.e., unresponsive wakefulness syndrome (UWS), minimally conscious state (MCS), emergence from MCS (EMCS); **Figure 2C**). All correlation coefficients, derived from all voxels in white matter, were highly significant (i.e.,  $R^2$  ranging from 0.73 to 0.99), where lines for regression and identity are, respectively, shown with solid and dashed lines. **(A)** The normal eyes open group (vs. the control group) showed  $\sim 8\%$  higher  $qCMR_{glc}$ . **(B)** The congenitally blind group (vs. the control group) showed 1-2% lower  $qCMR_{glc}$ . **(C)** The sedated groups (vs. the control group) showed  $\sim 8\%$  lower  $qCMR_{glc}$  with 0.25% sevoflurane,  $\sim 12\%$  lower  $qCMR_{glc}$  with 0.5% sevoflurane, and  $\sim 9\%$  lower  $qCMR_{glc}$  with 1% desflurane. **(D)** The disorders of consciousness groups (vs. the control group) showed  $\sim 29\%$  lower  $qCMR_{glc}$  with EMCS,  $\sim 31\%$  lower  $qCMR_{glc}$  with MCS, and  $\sim 43\%$  lower  $qCMR_{glc}$  with UWS. See **Table 3** for comparison of slopes and intercepts when the linear regression was conducted without forcing the intercept through the origin.

**Figure S3.** Thresholded  $t$ -maps of metabolic variations in disorders of consciousness.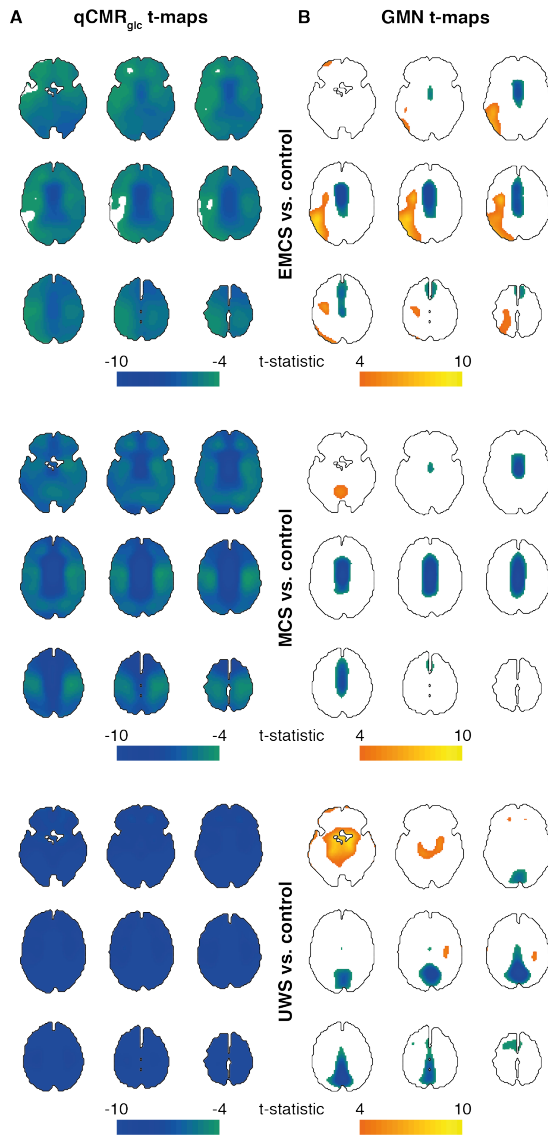

Spatial distributions of metabolic variations in patients with disorders of consciousness (i.e., UWS, MCS, EMCS in [Figure 2C](#) in the main text) vs. the control group (i.e., HAEC in [Figure 2A](#) in the main text), shown with respect to *thresholded* student's  $t$ -maps using **(A)** qCMR<sub>glc</sub> images and **(B)** GMN images. In qCMR<sub>glc</sub> images there are only large sized negative clusters (>98% of voxels), whereas in GMN images there are many smaller sized negative (6-7% of voxels) and positive (0.1-14% of voxels) clusters. The *unthresholded* student's  $t$ -maps are shown in [Figure 3](#) in the main text.

**Figure S4.** Thresholded  $t$ -maps of metabolic variations in anesthetic sedation.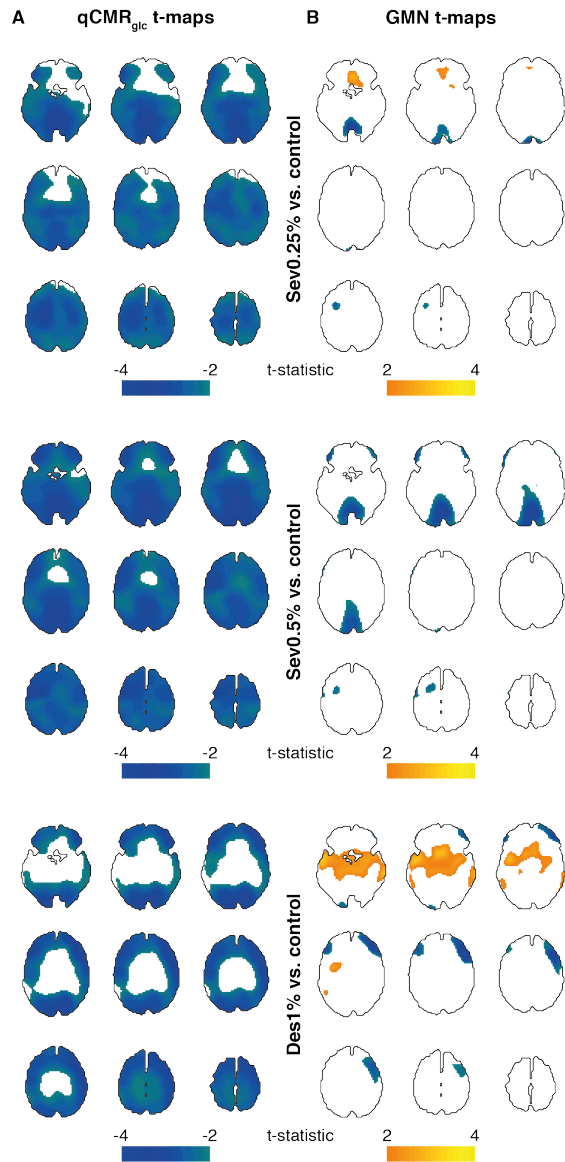

Spatial distributions of metabolic variations in patients with sedation (i.e., Des1%, Sev0.25%, Sev0.5% in [Figure 2B](#) in the main text) vs. the control group (i.e., HAEC in [Figure 2A](#) in the main text), shown with respect to *thresholded* student's  $t$ -maps using **(A)** qCMR<sub>glc</sub> images and **(B)** GMN images. In qCMR<sub>glc</sub> images there are only large sized negative clusters (71-96% of voxels), whereas in GMN images there are many smaller sized negative (0.2-13% of voxels) and positive (0.3-11% of voxels) clusters. The *unthresholded* student's  $t$ -maps are shown in [Figure 4](#) in the main text.

**Figure S5.** Thresholded  $t$ -maps of metabolic variations with eyes open.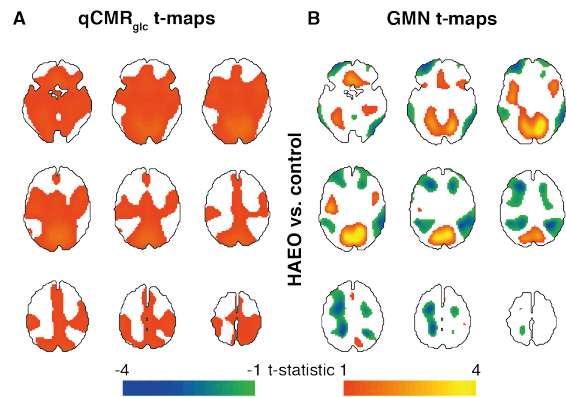

Spatial distributions of metabolic variations with healthy participants with eyes open (i.e., HAEO in **Figure 2B** in the main text) vs. the eyes-closed control group (i.e., HAEC in **Figure 2A** in the main text), shown with respect to *thresholded* student's  $t$ -maps using (A) qCMR<sub>glc</sub> images and (B) GMN images. In qCMR<sub>glc</sub> images there is only one large sized positive cluster (60% of voxels), whereas in GMN images there are many smaller sized negative (2-20% of voxels) and positive (0.1-9% of voxels) clusters. The *unthresholded* student's  $t$ -maps are shown in **Figure 5** in the main text.

**Figure S6.** Thresholded  $t$ -maps of metabolic variations in congenital blindness.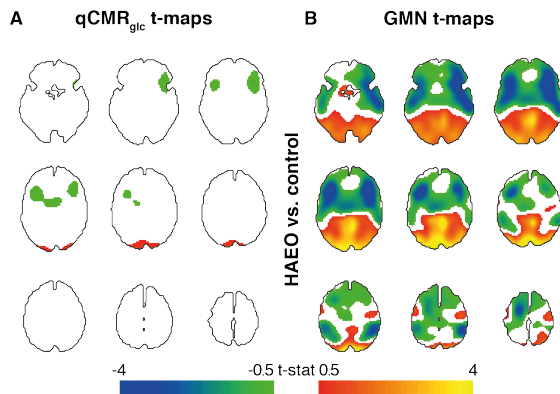

Spatial distributions of metabolic variations in the congenitally blind (i.e., CB in [Figure 2B](#) in the main text) vs. the eyes-closed control group (i.e., HAEC in [Figure 2A](#) in the main text), shown with respect to *thresholded* student's  $t$ -maps using **(A)** qCMR<sub>glc</sub> images and **(B)** GMN images. In qCMR<sub>glc</sub> images there is only one small sized positive cluster and two small sized negative clusters (each 1% of voxels), whereas in GMN images there is one large sized negative cluster (45% of voxels) and three smaller sized positive clusters (0.2-27% of voxels) clusters. The *unthresholded* student's  $t$ -maps are shown in [Figure 6](#) in the main text.

**Figure S7.** Magnitude of metabolic variations with and without GMN.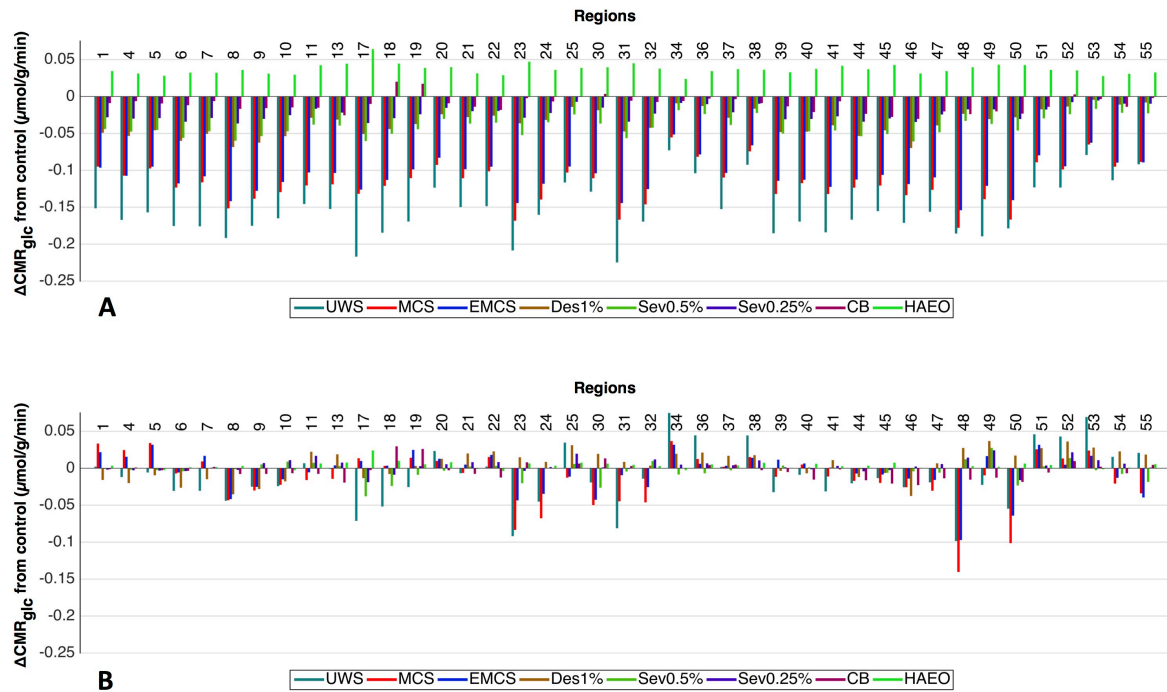

Magnitude of changes in glucose metabolism ( $\Delta\text{CMR}_{\text{glc}}$ ) across gray matter for different resting states in relation to the control group of healthy awake sighted people with eyes closed (i.e., HAEC in **Figure 1A**, middle) using **(A)** qCMR<sub>glc</sub> images and **(B)** GMN images. The horizontal axis represents Brodmann-like regions (**Table S1**), whereas the vertical axis displays  $\Delta\text{CMR}_{\text{glc}}$  for 8 groups (vs. the control group), which included healthy awake sighted people with eyes open (i.e., HAEO in **Figure 1A**, top), awake people with congenital blindness (i.e., CB in **Figure 1A**, bottom), normal people under sedation (i.e., Des1%, Sev0.25%, Sev0.5% in **Figure 1B**), and patients with disorders of consciousness (i.e., UWS, MCS, EMCS in **Figure 1C**). **(A)** With qCMR<sub>glc</sub> images for all groups, except CB, globally unidirectional  $\Delta\text{CMR}_{\text{glc}}$  were detected, where the dynamic range of  $\Delta\text{CMR}_{\text{glc}}$  from UWS to HAEO was  $\sim 0.3 \mu\text{mol/g/min}$ . **(B)** With GMN images for all groups regionally bidirectional  $\Delta\text{CMR}_{\text{glc}}$  were detected, where the dynamic range of  $\Delta\text{CMR}_{\text{glc}}$  from UWS to HAEO was  $\sim 0.1 \mu\text{mol/g/min}$ . See **Figures 3-6** and **Figures S3-S6** for unthresholded and thresholded *t*-maps, respectively.



**Table S1. Description of Brodmann-like regions in the human gray matter.**

| Region | Size  | Description of Region in terms of neuroanatomical identity (similar to Brodmann areas)            |
|--------|-------|---------------------------------------------------------------------------------------------------|
| 1      | 3.46% | Primary Somatosensory Cortex                                                                      |
| 4      | 2.35% | Primary Motor Cortex                                                                              |
| 5      | 0.65% | Somatosensory Association Cortex                                                                  |
| 6      | 8.68% | Premotor Cortex, Supplementary Motor Cortex                                                       |
| 7      | 6.06% | Somatosensory Association Cortex, Precuneus                                                       |
| 8      | 4.06% | includes Frontal Eye Fields                                                                       |
| 9      | 3.55% | Dorsolateral Prefrontal Cortex                                                                    |
| 10     | 6.26% | Anterior Prefrontal Cortex (most rostral part of superior and middle frontal gyri)                |
| 11     | 2.65% | Orbitofrontal Area (orbital and rectus gyri, plus the rostral part of the superior frontal gyrus) |
| 13     | 1.95% | Insular Cortex                                                                                    |
| 17     | 1.57% | Primary Visual Cortex (V1)                                                                        |
| 18     | 6.28% | Secondary Visual Cortex (V2)                                                                      |
| 19     | 5.71% | Associative Visual Cortex (V3)                                                                    |
| 20     | 2.55% | Inferior Temporal Gyrus                                                                           |
| 21     | 3.43% | Middle Temporal Gyrus                                                                             |
| 22     | 2.63% | Superior Temporal Gyrus, of which the caudal part is considered to contain the Wernicke's area    |
| 23     | 1.69% | Ventral Posterior Cingulate Cortex                                                                |
| 24     | 1.18% | Ventral Anterior Cingulate Cortex                                                                 |
| 25     | 0.22% | Subgenual Cortex                                                                                  |
| 30     | 0.33% | Part of Cingulate Cortex                                                                          |
| 31     | 1.84% | Dorsal Posterior Cingulate Cortex                                                                 |
| 32     | 1.37% | Dorsal Anterior Cingulate Cortex                                                                  |
| 34     | 0.07% | Anterior Entorhinal Cortex (on the parahippocampal gyrus)                                         |
| 36     | 1.80% | Parahippocampal Cortex (on the parahippocampal gyrus)                                             |
| 37     | 4.91% | Fusiform Gyrus                                                                                    |
| 38     | 3.05% | Temporopolar Area (most rostral part of the superior and middle temporal gyri)                    |
| 39     | 4.97% | Angular Gyrus, considered by some to be part of Wernicke's area                                   |
| 40     | 3.50% | Supramarginal Gyrus, considered by some to be part of Wernicke's area                             |
| 41     | 1.13% | Primary and Auditory Association Cortex                                                           |
| 44     | 2.46% | Pars Opercularis, part of Broca's area                                                            |
| 45     | 1.30% | Pars Triangularis Broca's area                                                                    |
| 46     | 1.00% | Dorsolateral Prefrontal Cortex                                                                    |
| 47     | 2.59% | Inferior Prefrontal Gyrus                                                                         |
| 48     | 0.96% | Caudate                                                                                           |
| 49     | 0.99% | Putamen                                                                                           |
| 50     | 1.28% | Thalamus                                                                                          |
| 51     | 0.15% | Globus Pallidus                                                                                   |
| 52     | 0.04% | Nucleus Accumbens                                                                                 |
| 53     | 0.41% | Amygdala                                                                                          |
| 54     | 0.83% | Hippocampus                                                                                       |
| 55     | 0.10% | Hypothalamus                                                                                      |

Regions are some well-defined gray matter regions based on neuroanatomy. Shown above are 41 regions, their description in terms of the underlying neuroanatomy, and size in relation to the entire gray matter space.
